# Supplementary material for: Polyphenol Metabolite Pyrogallol-O-Sulfate Decreases Microglial Activation and VEGF in Retinal Pigment Epithelium Cells and Diabetic Mouse Retina
Source: MDPI journal article supplement (doi:10.3390/ijms222111402), 2021-10-22
Supplement: s1 [file s1]

## Supplementary Materials

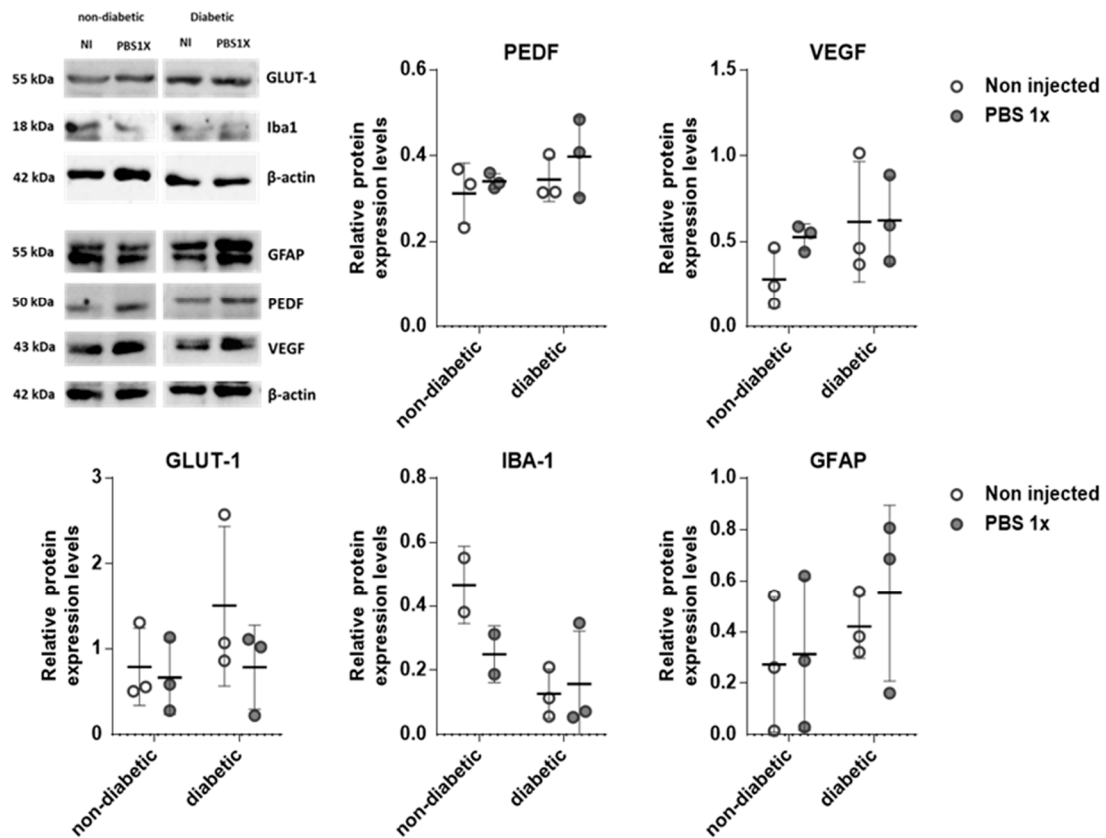

**Figure S1** Expression of proteins of interest followed by intraocular injections of vehicle solution (PBS 1x) in diabetic and age-match non-diabetic retinas of animals with 4 month-old. Protein levels were normalized to β-Actin. Data are expressed as mean ± SD ( $n = 2$  to 3 mice/group).

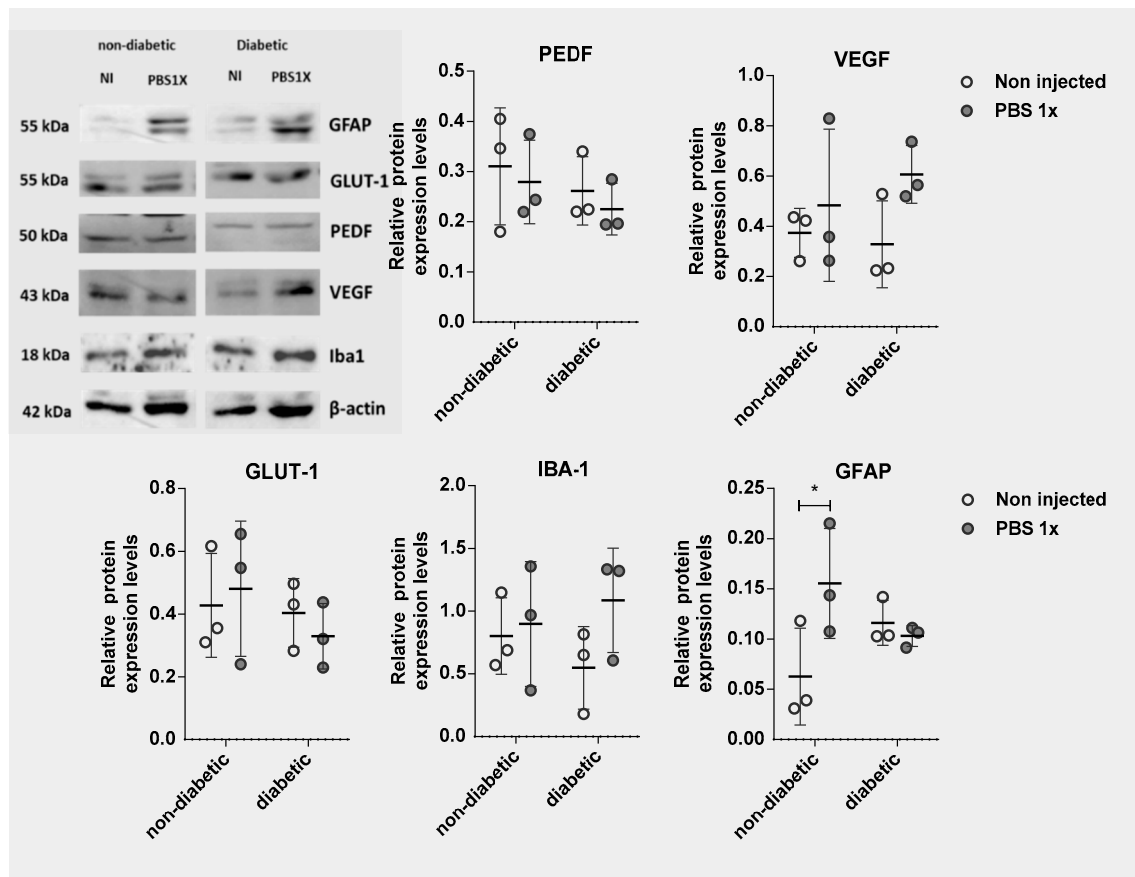

**Figure S2** Expression of proteins of interest followed by intraocular injections of vehicle solution (PBS 1x) in diabetic and age-match non-diabetic retinas of animals with 6 month-old. Protein levels were normalized to  $\beta$ -Actin. Data are expressed as mean  $\pm$  SD ( $n = 2$  to 3 mice/group). \*  $p < 0.05$  is significantly different compared to contralateral non-injected eye, determined by Two-way ANOVA (age and genotype) with Sidak's multiple comparison test.

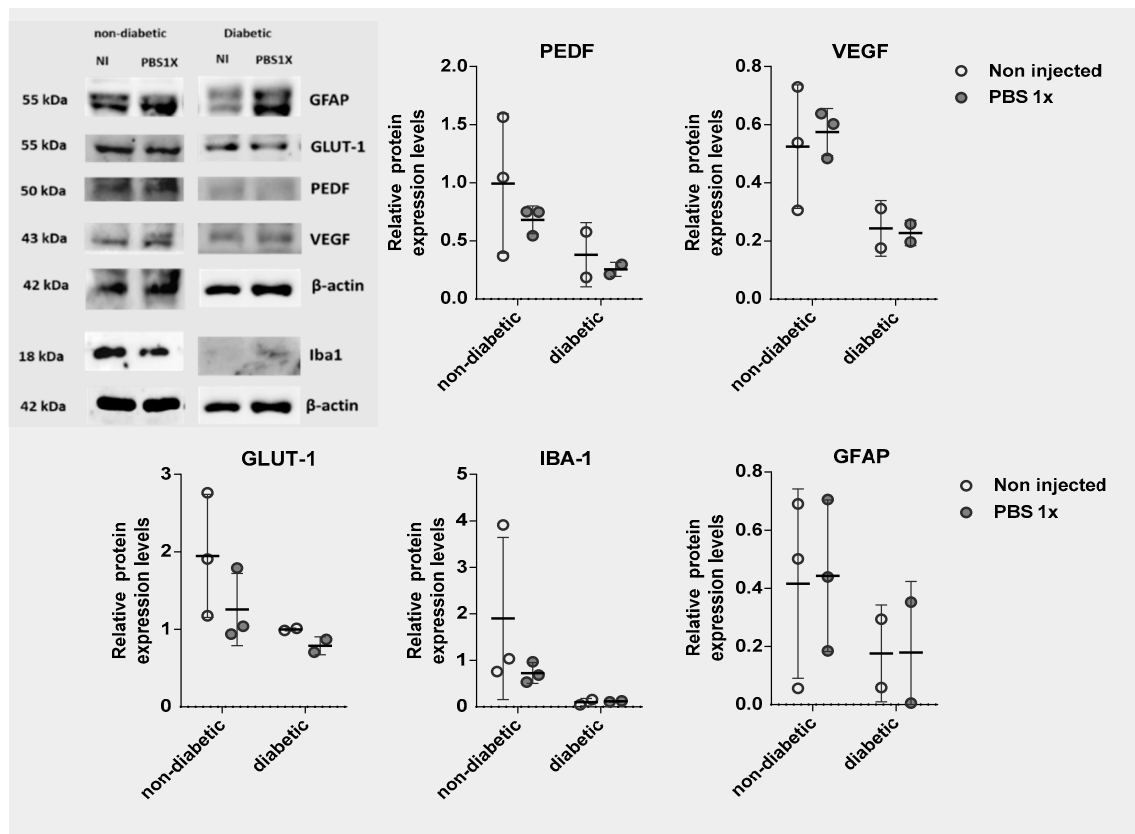

**Figure S3.** Expression of proteins of interest followed by intraocular injections of vehicle solution (PBS 1x) in diabetic and age-match non-diabetic retinas of animals with 8 month-old. Protein levels were normalized to  $\beta$ -Actin. Data are expressed as mean  $\pm$  SD ( $n = 2$  to 3 mice/group).

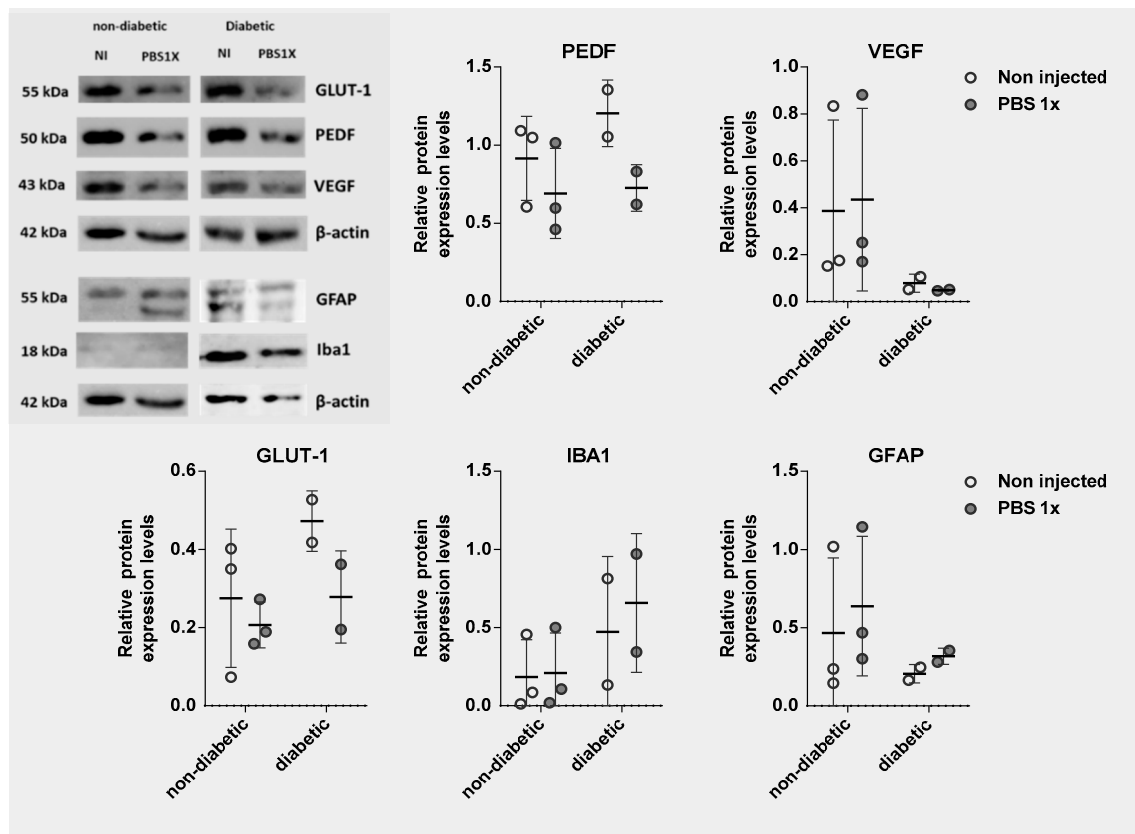

**Figure S4.** Expression of proteins of interest followed by intraocular injections of vehicle solution (PBS 1x) in diabetic and age-match non-diabetic retinas of animals with 9 month-old. Protein levels were normalized to  $\beta$ -Actin. Data are expressed as mean  $\pm$  SD ( $n = 2$  to 3 mice/group).

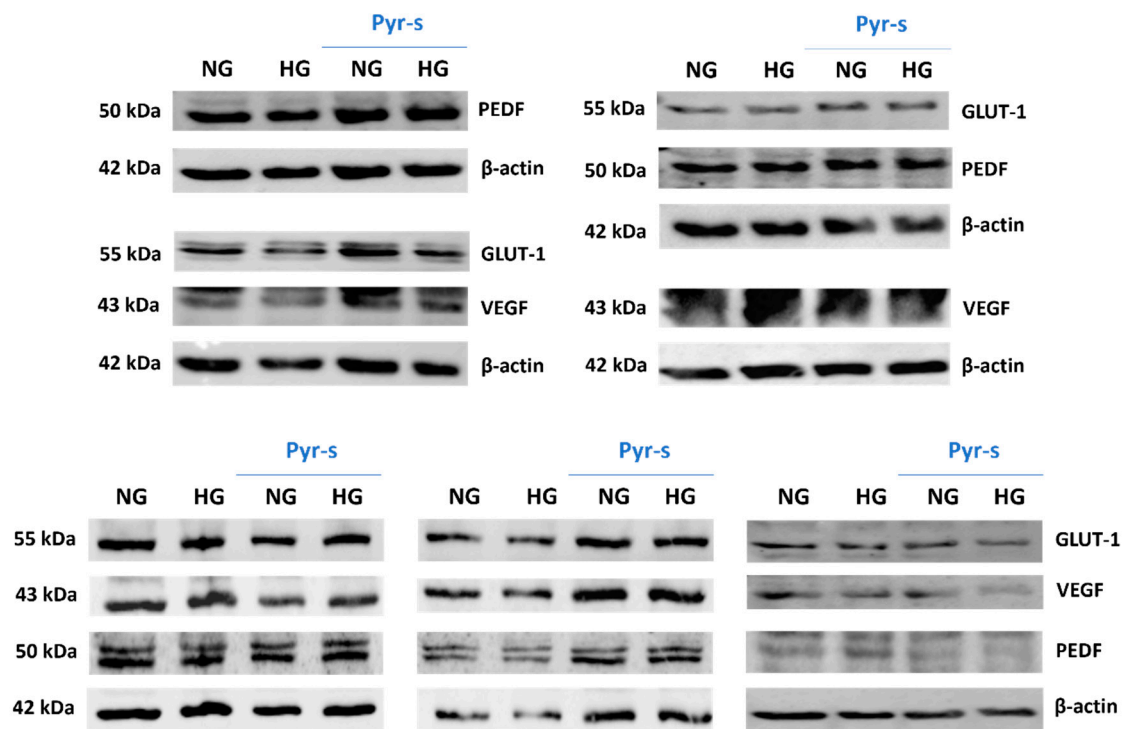

**Figure S5.** Western blot images showing bands of proteins of interest from RPE cells under normoxia with or without treatment with pyrogallol-*O*-sulfate for 8 hours. These bands were used as controls to normalize bands from cells under hypoxia, exposed to Pyr-s for 8 h upon hypoxic challenge (plotted in Figure 3).  $n = 5$ .
